# Supplementary material for: Interaction of HP1 and Brg1/Brm with the Globular Domain of Histone H3 Is Required for HP1-Mediated Repression
Source: PubMed Central journal article supplement (PMC2782133; doi:10.1371/journal.pgen.1000769), 2009-12-11
Supplement: pgen.1000769.s002.pdf [file pgen.1000769.s002.pdf]

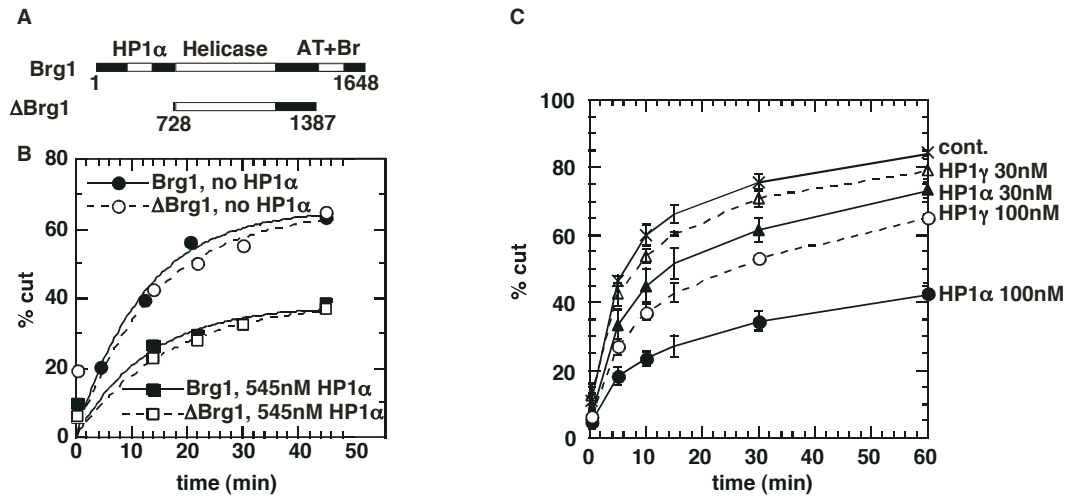

### HP1 $\gamma$ inhibits SWI/SNF remodeling with a reduced kinetic compared to HP1 $\alpha$

A: Schematic representation of the truncated Brg1 construct. HP1 $\alpha$ : HP1 $\alpha$  interaction domain (Nielsen et al. 2002). Helicase: catalytic domain. AT+Br: AT hook and bromodomain.

B: 5S polynucleosome template at 1 nM was pre-incubated with indicated concentrations of recombinant Flag-tagged HP1 $\alpha$  (produced in baculovirus) before digestion by *HhaI* in the absence or presence of either Brg1-F or  $\Delta$ Brg1-F as indicated. Aliquots were removed at various times, quenched, de-proteinized and analyzed on 1% agarose gel. Rate constants were determined by fitting the entire reaction (fraction of uncut substrate vs. time) to first-order (exponential decay) fits.

C: 5S polynucleosome template at 1 nM was pre-incubated with indicated concentrations of recombinant Flag-tagged HP1 $\alpha$  or HP1 $\gamma$  (produced in baculovirus) before digestion by *HhaI* in the presence of hSWI/SNF. Aliquots were removed at various times, quenched, de-proteinized and analyzed on 1% agarose gel. Amounts of cut DNA was quantified by PhosphorImager. Data shown is compiled from two independent experiments.
